# Supplementary material
Source: publisher site journal article supplement (https://www.spandidos-publications.com/4562/downloadSupplementary)
Supplement: Supplementary file 1 [file downloadSupplementary]

Figure S1. 77 common dysregulated genes in LV-HuR vs. LV-NC and sh-HuR vs. sh-NC groups. HuR, Human antigen R; ROS, reactive oxygen species; sh, short hairpin; NC, negative control; LV, lentiviral.

| No. | Gene Name  | Gene ID              | LV-HuR VS LV-NC |          |              | sh-HuR VS sh-NC |          |                |
|-----|------------|----------------------|-----------------|----------|--------------|-----------------|----------|----------------|
|     |            |                      | Fold change     | P-Value  | Regulation   | Fold change     | P-Value  | Regulation     |
| 1   | CALB2      | ENSG00000172137.18_3 | 10.40           | 3.82E-64 | Upregulation | 1.54            | 4.84E-03 | Upregulation   |
| 2   | INHBA      | ENSG00000122641.10_3 | 5.51            | 4.60E-45 | Upregulation | 1.63            | 5.71E-08 | Upregulation   |
| 3   | ACSS2      | ENSG00000131069.19_4 | 4.50            | 0        | Upregulation | 2.75            | 0        | Upregulation   |
| 4   | HMGCS1     | ENSG00000112972.14_3 | 4.34            | 0        | Upregulation | 2.19            | 9.93E-67 | Upregulation   |
| 5   | SOLE       | ENSG00000104549.11_2 | 3.62            | 0        | Upregulation | 2.14            | 1.03E-98 | Upregulation   |
| 6   | PPFIA4     | ENSG00000143847.15_3 | 3.51            | 1.41E-09 | Upregulation | 1.93            | 2.74E-07 | Upregulation   |
| 7   | LOXL2      | ENSG00000134013.15_3 | 3.35            | 0        | Upregulation | 1.67            | 1.47E-58 | Upregulation   |
| 8   | CAS9       | ENSG00000107159.12_2 | 3.29            | 4.64E-18 | Upregulation | 1.54            | 4.70E-03 | Upregulation   |
| 9   | MVD        | ENSG00000167508.11_3 | 3.27            | 0        | Upregulation | 2.09            | 2.13E-72 | Upregulation   |
| 10  | MSMO1      | ENSG00000052802.12_3 | 3.12            | 0        | Upregulation | 2.10            | 9.56E-90 | Upregulation   |
| 11  | SAMD4      | ENSG00000020577.13_3 | 3.12            | 6.82E-26 | Upregulation | 1.63            | 7.79E-06 | Upregulation   |
| 12  | F3         | ENSG00000117525.13_2 | 3.05            | 0        | Upregulation | 1.50            | 3.52E-44 | Upregulation   |
| 13  | LY6K       | ENSG00000160886.13_3 | 2.83            | 4.70E-19 | Upregulation | 1.68            | 5.20E-03 | Upregulation   |
| 14  | LPIN1      | ENSG00000134324.11_4 | 2.76            | 3.47E-86 | Upregulation | 2.34            | 5.51E-65 | Upregulation   |
| 15  | FDP5       | ENSG00000160752.14_2 | 2.76            | 7.99E-82 | Upregulation | 1.72            | 4.55E-25 | Upregulation   |
| 16  | NTSE       | ENSG00000135318.11_3 | 2.74            | 8.82E-17 | Upregulation | 1.50            | 1.65E-03 | Upregulation   |
| 17  | ACAT2      | ENSG00000120437.8_2  | 2.73            | 1.17E-24 | Upregulation | 1.85            | 9.11E-16 | Upregulation   |
| 18  | RTNAR      | ENSG00000040608.12_4 | 2.69            | 1.38E-17 | Upregulation | 1.74            | 1.00E-05 | Upregulation   |
| 19  | CYP51A1    | ENSG00000016301.16_5 | 2.61            | 5.33E-08 | Upregulation | 1.82            | 2.08E-02 | Upregulation   |
| 20  | ACLY       | ENSG00000131473.16_3 | 2.48            | 0        | Upregulation | 1.92            | 0        | Upregulation   |
| 21  | INSIG1     | ENSG00000186480.12_3 | 2.43            | 0        | Upregulation | 2.07            | 0        | Upregulation   |
| 22  | DHCR7      | ENSG00000172893.15_3 | 2.41            | 0.00E+00 | Upregulation | 1.88            | 8.36E-88 | Upregulation   |
| 23  | RUSC1AS1   | ENSG00000022585.6_4  | 2.39            | 5.89E-14 | Upregulation | 1.93            | 5.03E-06 | Upregulation   |
| 24  | ENC2       | ENSG00000111674.8_3  | 2.36            | 2.24E-10 | Upregulation | 1.66            | 2.55E-06 | Upregulation   |
| 25  | FASN       | ENSG00000169970.8_3  | 2.35            | 0        | Upregulation | 1.99            | 0        | Upregulation   |
| 26  | PCYT2      | ENSG00000185813.10_4 | 2.31            | 7.73E-59 | Upregulation | 1.53            | 1.93E-14 | Upregulation   |
| 27  | PPKFB4     | ENSG00000114268.11_3 | 2.30            | 9.51E-18 | Upregulation | 1.50            | 1.87E-04 | Upregulation   |
| 28  | ALDOC      | ENSG00000109107.13_3 | 2.28            | 4.21E-84 | Upregulation | 2.09            | 5.24E-69 | Upregulation   |
| 29  | EBP        | ENSG00000147155.10_4 | 2.23            | 1.69E-55 | Upregulation | 1.74            | 1.41E-28 | Upregulation   |
| 30  | LSS        | ENSG00000160285.14_2 | 2.19            | 2.99E-63 | Upregulation | 1.99            | 2.41E-42 | Upregulation   |
| 31  | LIPG       | ENSG00000101670.11_3 | 2.12            | 1.95E-24 | Upregulation | 1.76            | 3.87E-28 | Upregulation   |
| 32  | FDFT1      | ENSG00000079459.12_3 | 2.08            | 0        | Upregulation | 1.91            | 0        | Upregulation   |
| 33  | ID1        | ENSG00000067064.11_4 | 2.03            | 2.46E-48 | Upregulation | 1.81            | 2.58E-35 | Upregulation   |
| 34  | SEMA5B     | ENSG00000082684.15_5 | 1.99            | 7.40E-04 | Upregulation | 1.87            | 3.51E-03 | Upregulation   |
| 35  | AC112777.1 | ENSG00000025663.1_5  | 1.99            | 1.17E-07 | Upregulation | 0.42            | 1.38E-13 | Downregulation |
| 36  | MVK        | ENSG00000110921.13_5 | 1.95            | 3.12E-41 | Upregulation | 1.58            | 3.60E-19 | Upregulation   |
| 37  | HMGCR      | ENSG00000113161.15_3 | 1.88            | 2.08E-36 | Upregulation | 1.59            | 5.91E-28 | Upregulation   |
| 38  | COL4A1     | ENSG00000187498.15_4 | 1.86            | 9.00E-17 | Upregulation | 1.53            | 5.72E-03 | Upregulation   |
| 39  | PCSK9      | ENSG00000169174.10_2 | 1.85            | 3.22E-72 | Upregulation | 2.04            | 5.59E-95 | Upregulation   |

| No. | Gene Name | Gene ID               | LV-HuR VS LV-NC |          |                | sh-HuR VS sh-NC |          |                |
|-----|-----------|-----------------------|-----------------|----------|----------------|-----------------|----------|----------------|
|     |           |                       | Fold change     | P-Value  | Regulation     | Fold change     | P-Value  | Regulation     |
| 40  | HSD17B7   | ENSG00000132196.14_3  | 1.82            | 3.19E-09 | Upregulation   | 1.63            | 2.08E-06 | Upregulation   |
| 41  | LTBP2     | ENSG00000119681.11_3  | 1.79            | 1.24E-15 | Upregulation   | 1.52            | 3.94E-07 | Upregulation   |
| 42  | SNAI3-AS1 | ENSG000000260630.6_5  | 1.79            | 5.57E-05 | Upregulation   | 1.94            | 4.82E-06 | Upregulation   |
| 43  | PNPLA3    | ENSG00000100344.10_3  | 1.79            | 6.23E-06 | Upregulation   | 2.38            | 1.65E-10 | Upregulation   |
| 44  | LDLR      | ENSG00000130164.15_5  | 1.73            | 6.59E-78 | Upregulation   | 1.69            | 7.81E-78 | Upregulation   |
| 45  | ITGA7     | ENSG00000135424.16_4  | 1.73            | 6.24E-04 | Upregulation   | 1.53            | 4.03E-02 | Upregulation   |
| 46  | TMBIM1    | ENSG00000135926.14_5  | 1.72            | 4.15E-93 | Upregulation   | 1.61            | 4.02E-77 | Upregulation   |
| 47  | PORCN     | ENSG00000102312.21_4  | 1.71            | 1.15E-13 | Upregulation   | 1.66            | 8.18E-13 | Upregulation   |
| 48  | LINC00887 | ENSG00000214145.6_4   | 1.67            | 3.92E-03 | Upregulation   | 1.62            | 1.47E-02 | Upregulation   |
| 49  | SLC2A6    | ENSG00000160326.13_3  | 1.66            | 6.78E-05 | Upregulation   | 1.70            | 2.40E-04 | Upregulation   |
| 50  | PRSS23    | ENSG00000155687.11_3  | 1.65            | 8.62E-09 | Upregulation   | 1.52            | 6.80E-06 | Upregulation   |
| 51  | CLCN6     | ENSG00000110212.22_4  | 1.59            | 6.20E-07 | Upregulation   | 1.70            | 2.72E-08 | Upregulation   |
| 52  | SERPINB7  | ENSG00000166396.12_3  | 1.58            | 2.25E-12 | Upregulation   | 1.51            | 1.01E-09 | Upregulation   |
| 53  | OLF4      | ENSG00000102837.6_2   | 0.88            | 1.50E-73 | Downregulation | 0.53            | 2.76E-05 | Downregulation |
| 54  | TMPPRS11E | ENSG000000087128.9_2  | 0.14            | 7.12E-77 | Downregulation | 0.46            | 6.85E-09 | Downregulation |
| 55  | KRT1      | ENSG00000167768.4_2   | 0.21            | 2.61E-22 | Downregulation | 0.30            | 7.88E-07 | Downregulation |
| 56  | CLDN8     | ENSG00000156284.5_2   | 0.23            | 1.92E-06 | Downregulation | 0.24            | 1.59E-04 | Downregulation |
| 57  | CYP4B1    | ENSG00000142973.13_2  | 0.24            | 1.20E-49 | Downregulation | 0.52            | 2.99E-06 | Downregulation |
| 58  | DSG4      | ENSG00000175065.11_3  | 0.25            | 2.78E-20 | Downregulation | 0.49            | 9.16E-04 | Downregulation |
| 59  | AGR2      | ENSG00000106541.11_2  | 0.30            | 1.74E-29 | Downregulation | 0.53            | 5.94E-04 | Downregulation |
| 60  | LDLRAD1   | ENSG000000203985.10_2 | 0.31            | 2.46E-20 | Downregulation | 0.56            | 3.00E-04 | Downregulation |
| 61  | CD74      | ENSG00000195882.14_4  | 0.37            | 2.24E-20 | Downregulation | 0.51            | 2.28E-06 | Downregulation |
| 62  | C10orf59  | ENSG00000188373.4_2   | 0.37            | 1.50E-31 | Downregulation | 0.52            | 5.47E-10 | Downregulation |
| 63  | CASP1     | ENSG00000137752.23_4  | 0.40            | 2.94E-26 | Downregulation | 0.65            | 4.37E-04 | Downregulation |
| 64  | FGD3      | ENSG00000127084.18_3  | 0.41            | 9.44E-61 | Downregulation | 1.57            | 3.30E-16 | Upregulation   |
| 65  | MUC20     | ENSG00000176945.16_6  | 0.42            | 2.92E-06 | Downregulation | 0.52            | 3.92E-02 | Downregulation |
| 66  | ALDH3A1   | ENSG00000108602.17_3  | 0.47            | 0.00E+00 | Downregulation | 0.50            | 8.37E-75 | Downregulation |
| 67  | PTPRZ1    | ENSG00000106278.11_2  | 0.49            | 2.78E-10 | Downregulation | 0.57            | 4.07E-06 | Downregulation |
| 68  | DAPL1     | ENSG00000163331.11_4  | 0.52            | 3.43E-03 | Downregulation | 0.49            | 6.46E-03 | Downregulation |
| 69  | FOSB      | ENSG00000125740.13_3  | 0.53            | 0.00E+00 | Downregulation | 0.59            | 1.40E-56 | Downregulation |
| 70  | TNFRSF14  | ENSG00000157873.17_4  | 0.53            | 7.09E-07 | Downregulation | 0.65            | 3.50E-02 | Downregulation |
| 71  | AKR1B10   | ENSG00000198074.9_2   | 0.54            | 1.43E-08 | Downregulation | 0.56            | 1.25E-05 | Downregulation |
| 72  | GAS2L2    | ENSG00000270765.5_2   | 0.56            | 6.14E-10 | Downregulation | 0.62            | 1.18E-05 | Downregulation |
| 73  | HEG1      | ENSG00000173706.13_4  | 0.56            | 1.57E-09 | Downregulation | 1.58            | 2.44E-02 | Upregulation   |
| 74  | RBBP8NL   | ENSG00000130701.3_2   | 0.59            | 9.34E-05 | Downregulation | 0.59            | 3.02E-03 | Downregulation |
| 75  | SAMHD1    | ENSG00000101347.9_4   | 0.60            | 2.07E-11 | Downregulation | 0.65            | 2.46E-06 | Downregulation |
| 76  | DUSP1     | ENSG00000120129.5_2   | 0.61            | 1.70E-15 | Downregulation | 0.64            | 1.22E-15 | Downregulation |
| 77  | BCH2      | ENSG00000164039.14_3  | 0.65            | 7.97E-04 | Downregulation | 0.63            | 1.97E-02 | Downregulation |

Figure S2. KEGG pathway enrichment analysis of mRNA sequencing profiles. (A) KEGG pathway distribution diagram of upregulated and downregulated mRNA in LV-HuR vs. LV-NC and sh-HuR vs. sh-NC groups. (B) KEGG pathway enrichment of the dysregulated mRNAs from sh-HuR vs. sh-NC group. (C) KEGG pathway enrichment of the dysregulated mRNAs from LV-HuR vs. LV-NC group. KEGG, Kyoto Encyclopedia of Genes and Genomes; HuR, Human antigen R; ROS, reactive oxygen species; sh, short hairpin; NC, negative control; LV, lentiviral.

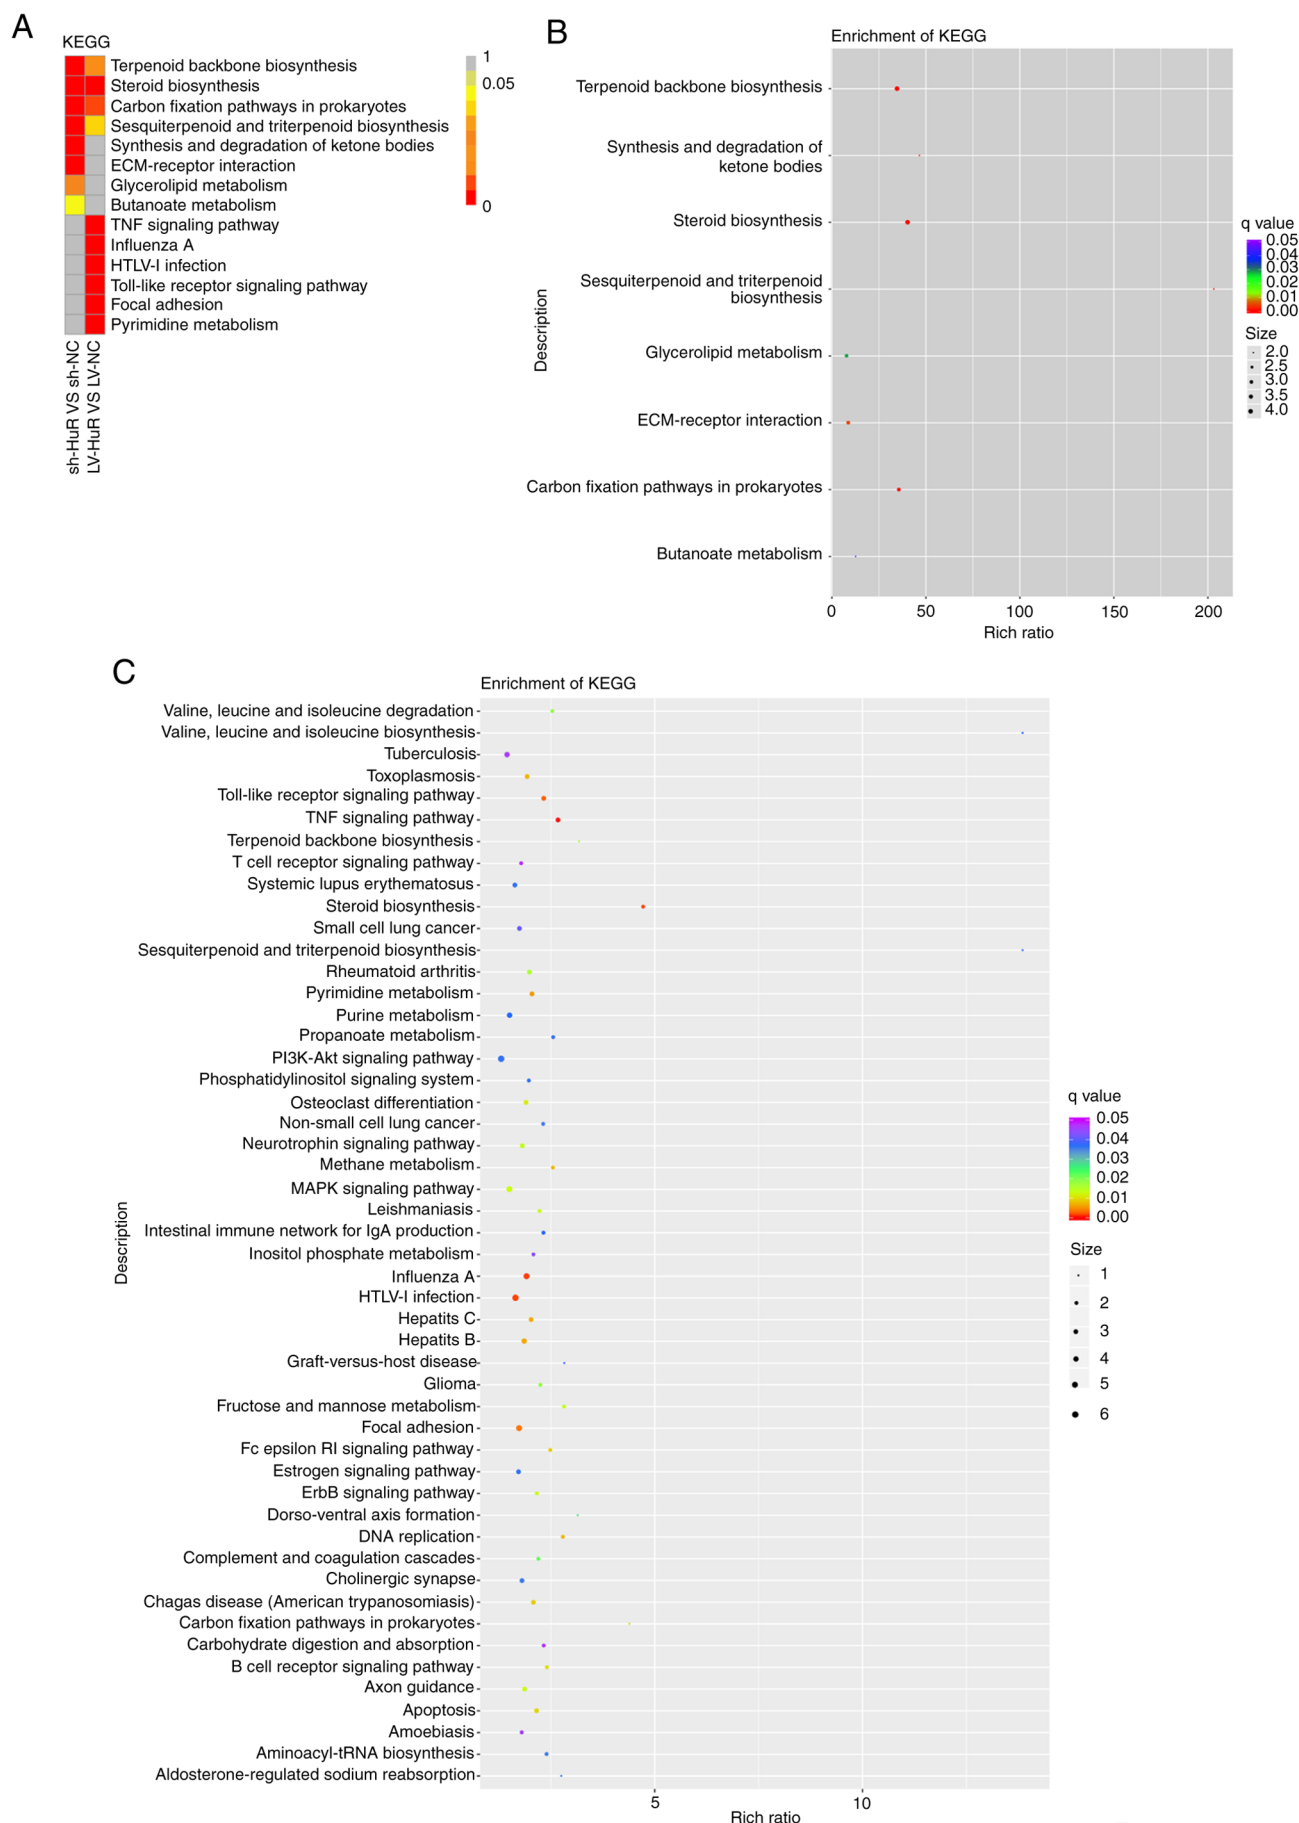

Figure S3. The list of upregulated genes of HuR RIP and corresponding mRNA after 5 Gy X-ray irradiation. HuR, Human antigen R; RIP, RNA immunoprecipitation.

| No. | Gene     | Gene ID      | HuR binding |          | Binding region | Expression  |          |
|-----|----------|--------------|-------------|----------|----------------|-------------|----------|
|     |          |              | Fold-change | P-Value  |                | Fold-change | P-Value  |
| 1   | PID1     | NM_001100818 | 11.00       | 5.32E-06 | exon           | 2.19        | 2.73E-02 |
| 2   | CLCA2    | NM_008536    | 3.75        | 8.29E-05 | exon           | 2.70        | 5.00E-05 |
| 3   | SIK1     | NM_173354    | 4.24        | 8.70E-05 | exon           | 2.29        | 4.25E-02 |
| 4   | SERPINE1 | NM_000602    | 4.55        | 0        | exon           | 2.36        | 5.00E-05 |
| 5   | SLC7A5   | NM_003486    | 4.78        | 0        | exon           | 2.28        | 5.00E-05 |
| 6   | PAPPA    | NM_002581    | 5.04        | 2.31E-11 | exon           | 2.20        | 5.00E-05 |
| 7   | BMPER    | NM_133468    | 7.67        | 4.69E-08 | exon           | 2.46        | 6.60E-03 |
| 8   | NLRP10   | NM_176821    | 7.77        | 1.62E-05 | exon           | 2.61        | 2.63E-02 |
| 9   | ADAM23   | NM_003812    | 7.77        | 1.62E-05 | exon           | 2.72        | 1.27E-02 |
| 10  | IL33     | NM_001314045 | 9.04        | 7.13E-10 | exon           | 3.25        | 1.96E-02 |
| 11  | ENDOCAN  | NM_007036    | 10.10       | 0        | exon           | 3.20        | 5.00E-05 |
| 12  | NTN1     | NM_004822    | 11.00       | 3.39E-08 | exon           | 3.90        | 3.00E-03 |
| 13  | SHROOM2  | NM_001320663 | 12.90       | 4.10E-07 | exon           | 2.54        | 1.20E-03 |
| 14  | DRAXIN   | NM_198545    | 161.00      | 2.48E-06 | exon           | 4.03        | 5.00E-05 |
